# Supplementary material
Source: Springer Nature journal article supplement (http://www.springermedizin.de/resource/supplementary/13018_2006_16_MOESM2_ESM.pdf/9636136)

**A****Axial compression bending stiffness  
lbf-in/degree**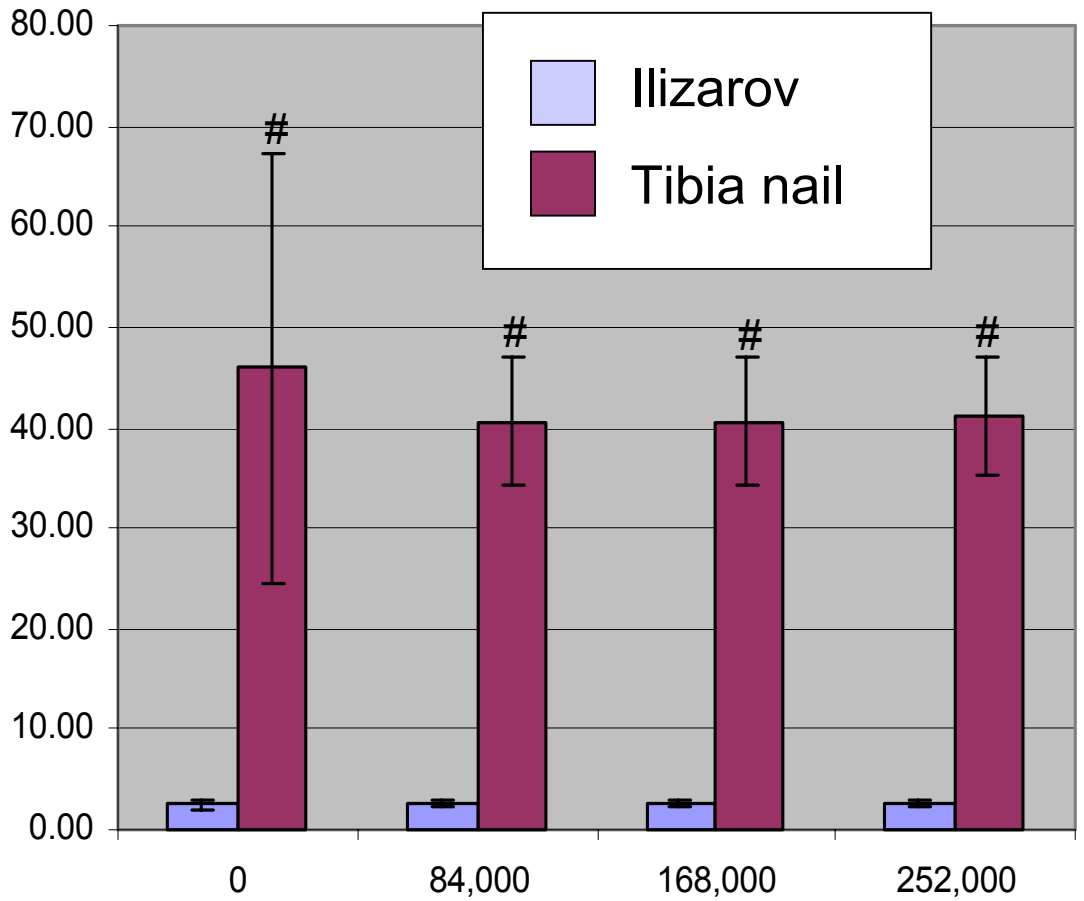**B****Torsional stiffness, lbf-in/degree**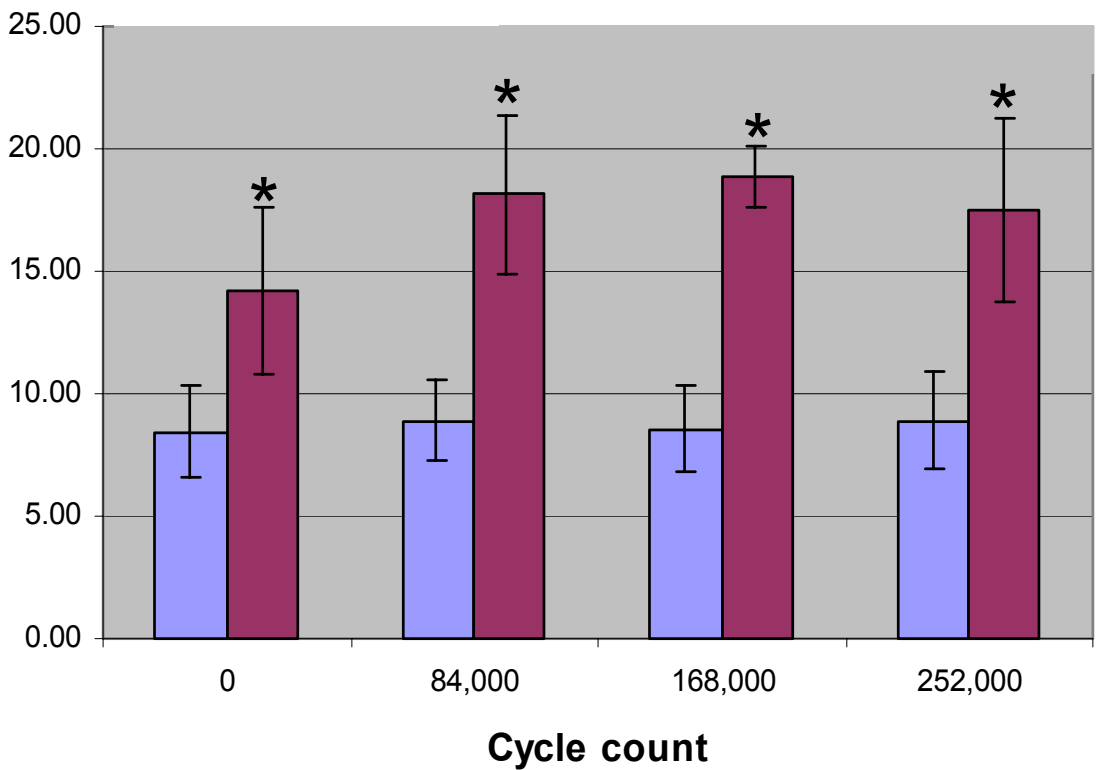

Supplement: MOESM2 [file 9636136]
